# Supplementary material for: Assessing species biomass contributions in microbial communities via metaproteomics
Source: PubMed Central journal article supplement (PMC5691128; doi:10.1038/s41467-017-01544-x), 2017-11-16
Supplement: 41467_2017_1544_MOESM1_ESM.pdf [file 41467_2017_1544_MOESM1_ESM.pdf]

### Supplementary Table 1: Composition of the UNEVEN mock communities

Cell number and protein amount minima and maxima for bacteria marked in yellow

| Label      | Name and strain                                                                                 | Protein input per biological replicate (µg) | Protein abundance % | Cell number input per biological replicate | Cell abundance % |
|------------|-------------------------------------------------------------------------------------------------|---------------------------------------------|---------------------|--------------------------------------------|------------------|
| PD         | <i>Pseudomonas denitrificans</i> ATCC 13867                                                     | 2128.51                                     | 2.871               | 1930000000                                 | 0.965            |
| BS         | <i>Bacillus subtilis</i> 168                                                                    | 583.83                                      | 0.788               | 407100000                                  | 0.204            |
| PaD        | <i>Paracoccus denitrificans</i> ATCC 17741, (Beijerinck and Minkman) Davis emend. Rainey et al. | 683.66                                      | 0.922               | 1720000000                                 | 0.860            |
| 199        | <i>Roseobacter</i> sp. AK199                                                                    | 1183.43                                     | 1.596               | 1450000000                                 | 0.725            |
| KF7        | <i>Pseudomonas pseudoalcaligenes</i> KF707                                                      | 863.80                                      | 1.165               | 603000000                                  | 0.302            |
| CV         | <i>Chromobacterium violaceum</i> CV026                                                          | 933.08                                      | 1.259               | 629000000                                  | 0.315            |
| ATN        | <i>Agrobacterium tumefaciens</i> NTL4                                                           | 4186.28                                     | 5.647               | 5790000000                                 | 2.895            |
| SMS        | <i>Stenotrophomonas maltophilia</i> SeITE02                                                     | 5946.27                                     | 8.021               | 6630000000                                 | 3.315            |
| Cup        | <i>Cupriavidus metallireducens</i> CH34; (DSM 2839; LMG 1195; CIP 107179)                       | 11504.98                                    | 15.519              | 26600000000                                | 13.300           |
| Pfl        | <i>Pseudomonas fluorescens</i> ATCC 13525, Type strain                                          | 4964.22                                     | 6.696               | 3360000000                                 | 1.680            |
| BXL        | <i>Burkholderia xenovorans</i> LB400                                                            | 321.37                                      | 0.433               | 2300000000                                 | 1.150            |
| DVH        | <i>Desulfovibrio vulgaris</i> Hildenborough                                                     | 701.58                                      | 0.946               | 930000000                                  | 0.465            |
| 137        | <i>Staphylococcus aureus</i> subsp. <i>aureus</i> Rosenbach, Smith [NCTC 10399], ATCC 13709     | 715.15                                      | 0.965               | 11900000000                                | 5.950            |
| 259        | <i>Staphylococcus aureus</i> subsp. <i>aureus</i> Rosenbach, Seattle 1945, ATCC 25923           | 1216.31                                     | 1.641               | 25300000000                                | 12.650           |
| Am2        | <i>Alteromonas macleodii</i> ATCC 27126                                                         | 707.47                                      | 0.954               | 1650000000                                 | 0.825            |
| 97 or 2197 | <i>Salmonella enterica</i> typhimurium LT2 with Flac+ Plasmid, SA2197                           | 4612.53                                     | 6.222               | 5140000000                                 | 2.570            |
| 91 or 2191 | <i>Escherichia coli</i> K12 with Flac+ Plasmid                                                  | 4290.54                                     | 5.788               | 6720000000                                 | 3.360            |
| LT2        | <i>Salmonella enterica</i> typhimurium LT2                                                      | 13887.47                                    | 18.733              | 20800000000                                | 10.400           |
| H88        | <i>Salmonella enterica</i> typhimurium LT2-H88, Rough mutant of LT2                             | 6537.78                                     | 8.819               | 7500000000                                 | 3.750            |
| HB2        | <i>Thermus Thermophilus</i> HB27                                                                | 1245.63                                     | 1.680               | 1610000000                                 | 0.805            |
| CRH        | <i>Chlamydomonas reinhardtii</i>                                                                | 2962.73                                     | 3.996               | 225000000                                  | 0.113            |
| M13        | Phage M13                                                                                       | 109.02                                      | 0.147               | 500000000                                  | 0.250            |
| F2         | Phage F2                                                                                        | 62.04                                       | 0.084               | 500000000                                  | 0.250            |
| P22        | Phage P22 (HT105)                                                                               | 78.77                                       | 0.106               | 42500000000                                | 21.250           |
| F0         | Phage F0                                                                                        | 65.28                                       | 0.088               | 5850000000                                 | 2.925            |
| ES18       | Phage ES18 (H1)                                                                                 | 65.55                                       | 0.088               | 725000000                                  | 0.363            |
| 841        | <i>Rhizobium leguminosarum</i> bv. <i>viciae</i> 3841                                           | 680.47                                      | 0.918               | 975000000                                  | 0.488            |
| VF         | <i>Rhizobium leguminosarum</i> bv. <i>viciae</i> VF39                                           | 1671.03                                     | 2.254               | 4500000000                                 | 2.250            |
| Ne2        | <i>Nitrosomonas europaea</i> ATCC 19718                                                         | 60.58                                       | 0.082               | 90000000                                   | 0.045            |
| Nu2        | <i>Nitrosomonas ureae</i> Nm10                                                                  | 402.68                                      | 0.543               | 90000000                                   | 0.045            |
| Nm2        | <i>Nitrospira multififormis</i> ATCC 25196                                                      | 155.16                                      | 0.209               | 75000000                                   | 0.038            |
| Nv         | <i>Nitrososphaera viennensis</i>                                                                | 607.41                                      | 0.819               | 11000000000                                | 5.500            |

## Supplementary Table 2: Composition of the EQUAL CELL NUMBER mock communities

Protein amount minimum and maximum for bacteria marked in yellow

| Label      | Name and strain                                                                                 | Protein input per biological replicate (µg) | Protein abundance % | Cell number input per biological replicate | Cell abundance % |
|------------|-------------------------------------------------------------------------------------------------|---------------------------------------------|---------------------|--------------------------------------------|------------------|
| PD         | <i>Pseudomonas denitrificans</i> ATCC 13867                                                     | 551.43                                      | 5.524               | 5.00E+08                                   | 3.571            |
| BS         | <i>Bacillus subtilis</i> 168                                                                    | 358.53                                      | 3.592               | 5.00E+08                                   | 3.571            |
| PaD        | <i>Paracoccus denitrificans</i> ATCC 17741, (Beijerinck and Minkman) Davis emend. Rainey et al. | 198.74                                      | 1.991               | 5.00E+08                                   | 3.571            |
| 199        | <i>Roseobacter</i> sp. AK199                                                                    | 408.08                                      | 4.088               | 5.00E+08                                   | 3.571            |
| KF7        | <i>Pseudomonas pseudoalcaligenes</i> KF707                                                      | 716.25                                      | 7.175               | 5.00E+08                                   | 3.571            |
| CV         | <i>Chromobacterium violaceum</i> CV026                                                          | 741.72                                      | 7.430               | 5.00E+08                                   | 3.571            |
| ATN        | <i>Agrobacterium tumefaciens</i> NTL4                                                           | 361.51                                      | 3.622               | 5.00E+08                                   | 3.571            |
| SMS        | <i>Stenotrophomonas maltophilia</i> SeITE02                                                     | 448.44                                      | 4.492               | 5.00E+08                                   | 3.571            |
| Cup        | <i>Cupriavidus metalliredcens</i> CH34; (DSM 2839; LMG 1195; CIP 107179)                        | 216.26                                      | 2.166               | 5.00E+08                                   | 3.571            |
| Pfl        | <i>Pseudomonas fluorescens</i> ATCC 13525, Type strain                                          | 738.72                                      | 7.400               | 5.00E+08                                   | 3.571            |
| BXL        | <i>Burkholderia xenovorans</i> LB400                                                            | 69.86                                       | 0.700               | 5.00E+08                                   | 3.571            |
| 137        | <i>Staphylococcus aureus</i> subsp. <i>aureus</i> Rosenbach, Smith [NCTC 10399], ATCC 13709     | 30.05                                       | 0.301               | 5.00E+08                                   | 3.571            |
| 259        | <i>Staphylococcus aureus</i> subsp. <i>aureus</i> Rosenbach, Seattle 1945, ATCC 25923           | 24.04                                       | 0.241               | 5.00E+08                                   | 3.571            |
| Am2        | <i>Alteromonas macleodii</i> ATCC 27126                                                         | 214.38                                      | 2.148               | 5.00E+08                                   | 3.571            |
| 97 or 2197 | <i>Salmonella enterica</i> typhimurium LT2 with Flac+ Plasmid, SA2197                           | 448.69                                      | 4.495               | 5.00E+08                                   | 3.571            |
| 91 or 2191 | <i>Escherichia coli</i> K12 with Flac+ Plasmid                                                  | 319.24                                      | 3.198               | 5.00E+08                                   | 3.571            |
| LT2        | <i>Salmonella enterica</i> typhimurium LT2                                                      | 333.83                                      | 3.344               | 5.00E+08                                   | 3.571            |
| H88        | <i>Salmonella enterica</i> typhimurium LT2-H88, Rough mutant of LT2                             | 435.85                                      | 4.366               | 5.00E+08                                   | 3.571            |
| HB2        | <i>Thermus Thermophilus</i> HB27                                                                | 386.84                                      | 3.875               | 5.00E+08                                   | 3.571            |
| CRH        | <i>Chlamydomonas reinhardtii</i>                                                                | 2194.62                                     | 21.986              | 5.00E+08                                   | 3.571            |
| M13        | Phage M13                                                                                       | 109.02                                      | 1.092               | 5.00E+08                                   | 3.571            |
| F2         | Phage F2                                                                                        | 62.04                                       | 0.621               | 5.00E+08                                   | 3.571            |
| P22        | Phage P22 (HT105)                                                                               | 0.93                                        | 0.009               | 5.00E+08                                   | 3.571            |
| F0         | Phage F0                                                                                        | 5.58                                        | 0.056               | 5.00E+08                                   | 3.571            |
| ES18       | Phage ES18 (H1)                                                                                 | 45.20                                       | 0.453               | 5.00E+08                                   | 3.571            |
| 841        | <i>Rhizobium leguminosarum</i> bv. <i>viciae</i> 3841                                           | 348.96                                      | 3.496               | 5.00E+08                                   | 3.571            |
| VF         | <i>Rhizobium leguminosarum</i> bv. <i>viciae</i> VF39                                           | 185.67                                      | 1.860               | 5.00E+08                                   | 3.571            |
| Nv         | <i>Nitrososphaera viennensis</i>                                                                | 27.61                                       | 0.277               | 5.00E+08                                   | 3.571            |

**Supplementary Table 3: Composition of the EQUAL PROTEIN AMOUNT mock communities**

Cell number minimum and maximum for bacteria marked in yellow

| Label      | Name and strain                                                                                 | Protein input per biological replicate ( $\mu\text{g}$ ) | Protein abundance % | Cell number input per biological replicate | Cell abundance % |
|------------|-------------------------------------------------------------------------------------------------|----------------------------------------------------------|---------------------|--------------------------------------------|------------------|
| PD         | <i>Pseudomonas denitrificans</i> ATCC 13867                                                     | 642.7                                                    | 4.259               | 5.83E+08                                   | 0.600            |
| BS         | <i>Bacillus subtilis</i> 168                                                                    | 642.7                                                    | 4.259               | 4.48E+08                                   | 0.462            |
| PaD        | <i>Paracoccus denitrificans</i> ATCC 17741, (Beijerinck and Minkman) Davis emend. Rainey et al. | 642.7                                                    | 4.259               | 1.62E+09                                   | 1.666            |
| 199        | <i>Roseobacter</i> sp. AK199                                                                    | 642.7                                                    | 4.259               | 7.87E+08                                   | 0.811            |
| KF7        | <i>Pseudomonas pseudoalcaligenes</i> KF707                                                      | 642.7                                                    | 4.259               | 4.49E+08                                   | 0.462            |
| CV         | <i>Chromobacterium violaceum</i> CV026                                                          | 642.7                                                    | 4.259               | 4.33E+08                                   | 0.446            |
| ATN        | <i>Agrobacterium tumefaciens</i> NTL4                                                           | 642.7                                                    | 4.259               | 8.89E+08                                   | 0.916            |
| SMS        | <i>Stenotrophomonas maltophilia</i> SeITE02                                                     | 642.7                                                    | 4.259               | 7.17E+08                                   | 0.738            |
| Cup        | <i>Cupriavidus metalliredcens</i> CH34; (DSM 2839; LMG 1195; CIP 107179)                        | 642.7                                                    | 4.259               | 1.49E+09                                   | 1.531            |
| Pfl        | <i>Pseudomonas fluorescens</i> ATCC 13525, Type strain                                          | 642.7                                                    | 4.259               | 4.35E+08                                   | 0.448            |
| BXL        | <i>Burkholderia xenovorans</i> LB400                                                            | 642.7                                                    | 4.259               | 4.60E+09                                   | 4.738            |
| 137        | <i>Staphylococcus aureus</i> subsp. <i>aureus</i> Rosenbach, Smith [NCTC 10399], ATCC 13709     | 642.7                                                    | 4.259               | 1.07E+10                                   | 11.017           |
| 259        | <i>Staphylococcus aureus</i> subsp. <i>aureus</i> Rosenbach, Seattle 1945, ATCC 25923           | 642.7                                                    | 4.259               | 1.34E+10                                   | 13.771           |
| Am2        | <i>Alteromonas macleodii</i> ATCC 27126                                                         | 642.7                                                    | 4.259               | 1.50E+09                                   | 1.544            |
| 97 or 2197 | <i>Salmonella enterica</i> typhimurium LT2 with Flac+ Plasmid, SA2197                           | 642.7                                                    | 4.259               | 7.16E+08                                   | 0.738            |
| 91 or 2191 | <i>Escherichia coli</i> K12 with Flac+ Plasmid                                                  | 642.7                                                    | 4.259               | 1.01E+09                                   | 1.037            |
| LT2        | <i>Salmonella enterica</i> typhimurium LT2                                                      | 642.7                                                    | 4.259               | 9.63E+08                                   | 0.992            |
| H88        | <i>Salmonella enterica</i> typhimurium LT2-H88, Rough mutant of LT2                             | 642.7                                                    | 4.259               | 7.37E+08                                   | 0.760            |
| HB2        | <i>Thermus Thermophilus</i> HB27                                                                | 642.7                                                    | 4.259               | 8.31E+08                                   | 0.856            |
| CRH        | <i>Chlamydomonas reinhardtii</i>                                                                | 642.7                                                    | 4.259               | 4.88E+07                                   | 0.050            |
| M13        | Phage M13                                                                                       | 62                                                       | 0.411               | 2.84E+08                                   | 0.293            |
| F2         | Phage F2                                                                                        | 62                                                       | 0.411               | 5.00E+08                                   | 0.515            |
| P22        | Phage P22 (HT105)                                                                               | 62                                                       | 0.411               | 3.35E+10                                   | 34.459           |
| F0         | Phage F0                                                                                        | 62                                                       | 0.411               | 5.56E+09                                   | 5.723            |
| ES18       | Phage ES18 (H1)                                                                                 | 62                                                       | 0.411               | 6.86E+08                                   | 0.706            |
| 841        | <i>Rhizobium leguminosarum</i> bv. <i>viciae</i> 3841                                           | 642.7                                                    | 4.259               | 9.21E+08                                   | 0.949            |
| VF         | <i>Rhizobium leguminosarum</i> bv. <i>viciae</i> VF39                                           | 642.7                                                    | 4.259               | 1.73E+09                                   | 1.783            |
| Nv         | <i>Nitrososphaera viennensis</i>                                                                | 642.7                                                    | 4.259               | 1.16E+10                                   | 11.990           |

**Supplementary Table 4: Statistical comparison of quantification of mock communities with metaproteomics (MP), metagenomics (MG) and 16S rRNA amplicon sequencing**

|                                                           | EQUAL CELL NUMBER community |            |          | EQUAL PROTEIN AMOUNT community |            |        | UNEVEN community |           |         |
|-----------------------------------------------------------|-----------------------------|------------|----------|--------------------------------|------------|--------|------------------|-----------|---------|
|                                                           | MP                          | MG         | 16S      | MP                             | MG         | 16S    | MP               | MG        | 16S     |
| <b>Compared to protein input</b>                          |                             |            |          |                                |            |        |                  |           |         |
| Average x fold deviation from expected value <sup>1</sup> | 0.643                       | 14.159     | 1.125    | 0.459                          | 4.382      | 0.578  | 0.511            | 5.513     | 0.830   |
| SD <sup>2</sup>                                           | 0.481                       | 45.480     | 0.816    | 0.337                          | 12.882     | 0.524  | 0.311            | 18.937    | 1.457   |
| p-value <sup>3</sup>                                      | NA                          | 0.00000003 | 0.000009 | NA                             | 0.00000002 | 0.0002 | NA               | 0.0000004 | 0.00002 |
| <b>Compared to cell input</b>                             |                             |            |          |                                |            |        |                  |           |         |
| Average x fold deviation from expected value <sup>1</sup> | 0.797                       | 0.644      | 0.911    | 4.918                          | 2.181      | 5.934  | 1.905            | 1.247     | 1.809   |
| SD <sup>2</sup>                                           | 0.746                       | 0.596      | 0.888    | 4.857                          | 1.796      | 4.940  | 2.166            | 1.670     | 3.009   |
| p-value <sup>3</sup>                                      | NA                          | 0.006      | 0.002    | NA                             | 0.0000006  | 0.001  | NA               | 0.0003    | 0.30    |

<sup>1</sup>: The fold deviation from expected value was calculated by dividing the measured species abundances by the known relative input protein amount or cell number. This would result in a value of 1 if measurement and known input were exactly the same. For each value the deviation from this perfect accuracy value of 1 was calculated. The lowest average deviation values for each community are highlighted in green.

<sup>2</sup>: Standard deviation of the deviation values

<sup>3</sup>: T-test on the average x fold deviations for all biological replicates for each community and method. The data was log10-transformed before the test to account for the large differences in standard deviations. Comparing either metagenomics or 16S rRNA amplicon sequencing results with the metaproteomic results.

**Supplementary Table 5: Overview of the metaproteomic data provided with this study**

| File Base Name | Run No. | Number of technical replicate runs | Number of fractions per run | Internal Experiment No. | Sample type/ species for pure cultures                | LC method | Gradient length (min) |
|----------------|---------|------------------------------------|-----------------------------|-------------------------|-------------------------------------------------------|-----------|-----------------------|
| PD             | 3       | 1                                  | 1                           | 251                     | <i>Pseudomonas denitrificans</i> ATCC 13867           | 1D        | 260                   |
| NV             | 3       | 1                                  | 1                           | 251                     | <i>Nitrososphaera viennensis</i>                      | 1D        | 260                   |
| Nm-B           | 3       | 1                                  | 1                           | 251                     | <i>Nitrospira multififormis</i> ATCC 25196            | 1D        | 260                   |
| 841            | 3       | 1                                  | 1                           | 251                     | <i>Rhizobium leguminosarum</i> bv. <i>viciae</i> 3841 | 1D        | 260                   |
| C1             | 1&2     | 2                                  | 1                           | 253                     | Equal cell number mock community                      | 1D        | 460                   |
| C2             | 1&2     | 2                                  | 1                           | 253                     | Equal cell number mock community                      | 1D        | 460                   |
| C3             | 1&2     | 2                                  | 1                           | 253                     | Equal cell number mock community                      | 1D        | 460                   |
| C4             | 1&2     | 2                                  | 1                           | 253                     | Equal cell number mock community                      | 1D        | 460                   |
| P1             | 1&2     | 2                                  | 1                           | 253                     | Equal protein amount mock community                   | 1D        | 460                   |
| P2             | 1&2     | 2                                  | 1                           | 253                     | Equal protein amount mock community                   | 1D        | 460                   |
| P3             | 1&2     | 2                                  | 1                           | 253                     | Equal protein amount mock community                   | 1D        | 460                   |
| P4             | 1&2     | 2                                  | 1                           | 253                     | Equal protein amount mock community                   | 1D        | 460                   |
| U1             | 1&2     | 2                                  | 1                           | 253                     | Uneven mock community                                 | 1D        | 460                   |
| U2             | 1&2     | 2                                  | 1                           | 253                     | Uneven mock community                                 | 1D        | 460                   |
| U3             | 1&2     | 2                                  | 1                           | 253                     | Uneven mock community                                 | 1D        | 460                   |
| U4             | 1&2     | 2                                  | 1                           | 253                     | Uneven mock community                                 | 1D        | 460                   |
| C1             | 3       | 1                                  | 12                          | 253                     | Equal cell number mock community                      | 2D        | 120                   |
| C2             | 3       | 1                                  | 12                          | 253                     | Equal cell number mock community                      | 2D        | 120                   |
| C3             | 3       | 1                                  | 12                          | 253                     | Equal cell number mock community                      | 2D        | 120                   |
| C4             | 3       | 1                                  | 12                          | 253                     | Equal cell number mock community                      | 2D        | 120                   |
| P1             | 3       | 1                                  | 12                          | 253                     | Equal protein amount mock community                   | 2D        | 120                   |
| P2             | 3       | 1                                  | 12                          | 253                     | Equal protein amount mock community                   | 2D        | 120                   |
| P3             | 3       | 1                                  | 12                          | 253                     | Equal protein amount mock community                   | 2D        | 120                   |
| P4             | 3       | 1                                  | 12                          | 253                     | Equal protein amount mock community                   | 2D        | 120                   |
| U1             | 3       | 1                                  | 12                          | 253                     | Uneven mock community                                 | 2D        | 120                   |
| U2             | 3       | 1                                  | 12                          | 253                     | Uneven mock community                                 | 2D        | 120                   |
| U3             | 3       | 1                                  | 12                          | 253                     | Uneven mock community                                 | 2D        | 120                   |
| U4             | 3       | 1                                  | 12                          | 253                     | Uneven mock community                                 | 2D        | 120                   |
| C1             | 4&5     | 2                                  | 1                           | 253                     | Equal cell number mock community                      | 1D        | 260                   |
| C2             | 4&5     | 2                                  | 1                           | 253                     | Equal cell number mock community                      | 1D        | 260                   |
| C3             | 4&5     | 2                                  | 1                           | 253                     | Equal cell number mock community                      | 1D        | 260                   |
| C4             | 4&5     | 2                                  | 1                           | 253                     | Equal cell number mock community                      | 1D        | 260                   |
| P1             | 4&5     | 2                                  | 1                           | 253                     | Equal protein amount mock community                   | 1D        | 260                   |
| P2             | 4&5     | 2                                  | 1                           | 253                     | Equal protein amount mock community                   | 1D        | 260                   |
| P3             | 4&5     | 2                                  | 1                           | 253                     | Equal protein amount mock community                   | 1D        | 260                   |
| P4             | 4&5     | 2                                  | 1                           | 253                     | Equal protein amount mock community                   | 1D        | 260                   |

| <b>File Base Name</b> | <b>Run No.</b> | <b>Number of technical replicate runs</b> | <b>Number of fractions per run</b> | <b>Internal Experiment No.</b> | <b>Sample type/ species for pure cultures</b> | <b>LC method</b> | <b>Gradient length (min)</b> |
|-----------------------|----------------|-------------------------------------------|------------------------------------|--------------------------------|-----------------------------------------------|------------------|------------------------------|
|                       |                |                                           |                                    |                                | community                                     |                  |                              |
| U1                    | 4&5            | 2                                         | 1                                  | 253                            | Uneven mock community                         | 1D               | 260                          |
| U2                    | 4&5            | 2                                         | 1                                  | 253                            | Uneven mock community                         | 1D               | 260                          |
| U3                    | 4&5            | 2                                         | 1                                  | 253                            | Uneven mock community                         | 1D               | 260                          |
| U4                    | 4&5            | 2                                         | 1                                  | 253                            | Uneven mock community                         | 1D               | 260                          |

**Supplementary Table 6: Comparison of the detection limit and quantification accuracy for the UNEVEN mock community depending on LC method, gradient length and technical replication**

Detailed data for Figure 4

| Run #                            | Average # of PSMs for four biological replicates normalized to % |       |       |       |       | Average # PSMs for four biological replicates |       |       |       |       | Average # identified proteins for four biological replicates |     |     |     |      |     |
|----------------------------------|------------------------------------------------------------------|-------|-------|-------|-------|-----------------------------------------------|-------|-------|-------|-------|--------------------------------------------------------------|-----|-----|-----|------|-----|
|                                  | 4                                                                | 4&5   | 1     | 1&2   | 3     | 4                                             | 4&5   | 1     | 1&2   | 3     | 4                                                            | 4&5 | 1   | 1&2 | 3    |     |
| LC-run type                      | 1D                                                               | 1D    | 1D    | 1D    | 2D    | 1D                                            | 1D    | 1D    | 1D    | 2D    | 1D                                                           | 1D  | 1D  | 1D  | 2D   |     |
| Gradient length (min)            | 260                                                              | 260   | 460   | 460   | 120   | 260                                           | 260   | 460   | 460   | 120   | 260                                                          | 260 | 460 | 460 | 120  |     |
| # technical replicates/fractions | 1                                                                | 2     | 1     | 2     | 12    | 1                                             | 2     | 1     | 2     | 12    | 1                                                            | 2   | 1   | 2   | 12   |     |
| Species label see Table S1       | Protein input %                                                  |       |       |       |       |                                               |       |       |       |       |                                                              |     |     |     |      |     |
| ATN                              | 5.647                                                            | 6.50  | 7.37  | 6.45  | 6.32  | 6.28                                          | 3590  | 8852  | 5473  | 10647 | 8293                                                         | 334 | 379 | 360 | 420  | 384 |
| Am2                              | 0.954                                                            | 0.47  | 0.53  | 0.46  | 0.56  | 0.53                                          | 257   | 632   | 392   | 941   | 693                                                          | 15  | 18  | 16  | 22   | 24  |
| BS                               | 0.788                                                            | 0.71  | 0.68  | 0.73  | 0.73  | 0.87                                          | 391   | 813   | 622   | 1237  | 1143                                                         | 39  | 47  | 38  | 51   | 50  |
| BXL                              | 0.433                                                            | 0.14  | 0.05  | 0.07  | 0.08  | 0.14                                          | 75    | 62    | 58    | 137   | 191                                                          | 2   | 3   | 1   | 2    | 2   |
| CRH                              | 3.996                                                            | 1.18  | 1.42  | 1.13  | 1.10  | 1.63                                          | 654   | 1704  | 956   | 1860  | 2148                                                         | 76  | 85  | 71  | 87   | 97  |
| CV                               | 1.259                                                            | 1.21  | 1.03  | 1.13  | 1.21  | 1.35                                          | 667   | 1238  | 962   | 2032  | 1788                                                         | 50  | 60  | 54  | 66   | 71  |
| Cup                              | 15.519                                                           | 22.24 | 26.09 | 21.17 | 20.77 | 20.49                                         | 12289 | 31322 | 17967 | 34985 | 27047                                                        | 881 | 984 | 909 | 1022 | 966 |
| DVH                              | 0.946                                                            | 0.80  | 0.92  | 0.76  | 0.75  | 0.70                                          | 440   | 1109  | 642   | 1256  | 917                                                          | 36  | 44  | 37  | 46   | 41  |
| K12                              | 5.788                                                            | 9.64  | 6.69  | 10.62 | 11.04 | 10.88                                         | 5326  | 8033  | 9018  | 18596 | 14354                                                        | 177 | 209 | 195 | 234  | 234 |
| Ne1                              | 0.082                                                            | 0.01  | 0.02  | 0.01  | 0.02  | 0.07                                          | 8     | 18    | 9     | 27    | 88                                                           | 2   | 3   | 2   | 3    | 4   |
| Nu1                              | 0.543                                                            | 0.01  | 0.00  | 0.01  | 0.04  | 0.01                                          | 6     | 1     | 9     | 71    | 20                                                           | 0   | 1   | 1   | 1    | 1   |
| NV                               | 0.819                                                            | 0.26  | 0.27  | 0.24  | 0.25  | 0.25                                          | 144   | 321   | 205   | 413   | 331                                                          | 21  | 27  | 20  | 26   | 25  |
| Nm1                              | 0.209                                                            | 0.12  | 0.04  | 0.18  | 0.18  | 0.07                                          | 64    | 47    | 156   | 299   | 98                                                           | 3   | 3   | 3   | 3    | 3   |
| PaD                              | 0.922                                                            | 0.47  | 0.42  | 0.49  | 0.49  | 0.47                                          | 262   | 508   | 418   | 827   | 615                                                          | 23  | 29  | 24  | 31   | 32  |
| ES18                             | 0.088                                                            | 0.00  | 0.00  | 0.00  | 0.00  | 0.00                                          | 0     | 0     | 0     | 0     | 0                                                            | 0   | 0   | 0   | 0    | 0   |
| F0                               | 0.088                                                            | 0.00  | 0.00  | 0.00  | 0.00  | 0.00                                          | 1     | 1     | 2     | 2     | 1                                                            | 0   | 0   | 1   | 1    | 1   |
| F2                               | 0.084                                                            | 0.00  | 0.00  | 0.00  | 0.00  | 0.00                                          | 0     | 0     | 0     | 0     | 0                                                            | 0   | 0   | 0   | 0    | 0   |
| M13                              | 0.147                                                            | 0.00  | 0.00  | 0.00  | 0.00  | 0.00                                          | 0     | 0     | 0     | 0     | 0                                                            | 0   | 0   | 0   | 0    | 0   |
| P22                              | 0.106                                                            | 0.01  | 0.07  | 0.01  | 0.01  | 0.01                                          | 8     | 88    | 5     | 11    | 13                                                           | 1   | 1   | 1   | 1    | 1   |
| PD                               | 2.871                                                            | 4.03  | 3.01  | 4.07  | 4.11  | 3.89                                          | 2225  | 3617  | 3452  | 6922  | 5133                                                         | 142 | 171 | 150 | 186  | 173 |
| Pfl                              | 6.696                                                            | 9.58  | 10.14 | 9.59  | 9.41  | 9.19                                          | 5296  | 12180 | 8143  | 15848 | 12127                                                        | 381 | 440 | 403 | 477  | 431 |
| KF7                              | 1.165                                                            | 1.91  | 0.97  | 1.90  | 2.13  | 2.37                                          | 1057  | 1163  | 1610  | 3592  | 3128                                                         | 48  | 57  | 48  | 62   | 77  |
| 841                              | 0.918                                                            | 1.23  | 1.29  | 1.16  | 1.16  | 1.39                                          | 681   | 1554  | 987   | 1948  | 1837                                                         | 60  | 74  | 68  | 80   | 79  |
| VF                               | 2.254                                                            | 1.69  | 1.35  | 1.73  | 1.77  | 1.66                                          | 934   | 1620  | 1470  | 2978  | 2192                                                         | 77  | 89  | 81  | 98   | 82  |
| AK199                            | 1.596                                                            | 1.13  | 1.12  | 1.08  | 1.12  | 1.08                                          | 624   | 1341  | 918   | 1888  | 1420                                                         | 69  | 84  | 71  | 91   | 85  |
| LT2                              | 33.773                                                           | 22.43 | 18.60 | 23.09 | 22.98 | 22.55                                         | 12395 | 22336 | 19597 | 38713 | 29766                                                        | 580 | 656 | 629 | 736  | 694 |
| 137                              | 0.965                                                            | 0.47  | 0.49  | 0.50  | 0.51  | 0.49                                          | 261   | 592   | 427   | 856   | 647                                                          | 23  | 26  | 27  | 31   | 29  |
| 259                              | 1.641                                                            | 0.35  | 0.50  | 0.42  | 0.41  | 0.42                                          | 194   | 600   | 354   | 689   | 552                                                          | 25  | 33  | 33  | 39   | 33  |
| SMS                              | 8.021                                                            | 12.87 | 15.97 | 12.44 | 12.33 | 12.31                                         | 7111  | 19174 | 10557 | 20772 | 16244                                                        | 550 | 623 | 574 | 670  | 631 |
| HB2                              | 1.680                                                            | 0.54  | 0.96  | 0.56  | 0.55  | 0.91                                          | 298   | 1152  | 477   | 925   | 1195                                                         | 45  | 62  | 55  | 70   | 91  |

**Supplementary Table 7: Sources and cultivation conditions of microorganisms used for mock communities**

| Label      | Name and strain                                                                                 | Source                                                      | Cultivation condition                                   |
|------------|-------------------------------------------------------------------------------------------------|-------------------------------------------------------------|---------------------------------------------------------|
| PD         | <i>Pseudomonas denitrificans</i> ATCC 13867                                                     | Dr. Jianwei Chen, University of Calgary                     | ATCC 3 Medium, 30° C, shaking, aerobic                  |
| BS         | <i>Bacillus subtilis</i> 168                                                                    | Dr. Jianwei Chen, University of Calgary                     | ATCC Medium 18, 30°C, shaking, aerobic                  |
| PaD        | <i>Paracoccus denitrificans</i> ATCC 17741, (Beijerinck and Minkman) Davis emend. Rainey et al. | Dr. Jianwei Chen, University of Calgary                     | ATCC 3 Medium, 30° C, shaking, aerobic                  |
| 199        | <i>Roseobacter</i> sp. AK199                                                                    | Dr. Marc Mußmann, University of Vienna                      | Marine Broth, 30°C, shaking, aerobic                    |
| KF7        | <i>Pseudomonas pseudoalcaligenes</i> KF707                                                      | Dr. Sean Cameroon Booth (Turner Lab), University of Calgary | LB, 30°C, shaking, aerobic                              |
| CV         | <i>Chromobacterium violaceum</i> CV026                                                          | Dr. Sean Cameroon Booth (Turner Lab), University of Calgary | LB, 30°C, shaking, aerobic                              |
| ATN        | <i>Agrobacterium tumefaciens</i> NTL4                                                           | Dr. Sean Cameroon Booth (Turner Lab), University of Calgary | LB, 30°C, shaking, aerobic                              |
| SMS        | <i>Stenotrophomonas maltophilia</i> SeTE02                                                      | Dr. Sean Cameroon Booth (Turner Lab), University of Calgary | LB, 30°C, shaking, aerobic                              |
| Cup        | <i>Cupriavidus metallireducens</i> CH34; (DSM 2839; LMG 1195; CIP 107179)                       | Dr. Sean Cameroon Booth (Turner Lab), University of Calgary | LB, 30°C, shaking, aerobic                              |
| Pfl        | <i>Pseudomonas fluorescens</i> ATCC 13525, Type strain                                          | Dr. Sean Cameroon Booth (Turner Lab), University of Calgary | LB, 30°C, shaking, aerobic                              |
| BXL        | <i>Burkholderia xenovorans</i> LB400                                                            | Dr. Sean Cameroon Booth (Turner Lab), University of Calgary | LB, 30°C, shaking, aerobic                              |
| DVH        | <i>Desulfovibrio vulgaris</i> Hildenborough                                                     | Johanna Voordouw, University of Calgary                     | Anaerobic, 30 °C, slowly shaking, Widdel-Pfennig Medium |
| 137        | <i>Staphylococcus aureus</i> subsp. <i>aureus</i> Rosenbach, Smith [NCTC 10399], ATCC 13709     | Jessica Duong (Storey Lab), University of Calgary           | Tryptic Soy Broth, 37°C, shaking, aerobic               |
| 259        | <i>Staphylococcus aureus</i> subsp. <i>aureus</i> Rosenbach, Seattle 1945, ATCC 25923           | Jessica Duong (Storey Lab), University of Calgary           | Tryptic Soy Broth, 37°C, shaking, aerobic               |
| Am2        | <i>Alteromonas macleodii</i> ATCC 27126                                                         | Dr. Emmo Hamann (Strous lab), University of Calgary         | Marine Agar, plates, 22°C                               |
| 97 or 2197 | <i>Salmonella enterica</i> typhimurium LT2 with Flac+ Plasmid, SA2197                           | Dr. Kenneth Sanderson, University of Calgary                | LB, 37°C, shaking, aerobic                              |
| 91 or 2191 | <i>Escherichia coli</i> K12 with Flac+ Plasmid                                                  | Dr. Kenneth Sanderson, University of Calgary                | LB, 37°C, shaking, aerobic                              |
| LT2        | <i>Salmonella enterica</i> typhimurium LT2                                                      | Dr. Kenneth Sanderson, University of Calgary                | LB, 37°C, shaking, aerobic                              |
| H88        | <i>Salmonella enterica</i> typhimurium LT2-H88, Rough mutant of LT2                             | Dr. Kenneth Sanderson, University of Calgary                | LB, 37°C, shaking, aerobic                              |
| HB2        | <i>Thermus Thermophilus</i> HB27                                                                | Joong-Jae Kim (Dunfield Lab), University of Calgary         | Nutrient Broth, 70°C, shaking, aerobic                  |
| CRH        | <i>Chlamydomonas reinhardtii</i>                                                                | Dr. Joenel Alcantara, University of Calgary                 | TAP medium, RT, with light source                       |
| M13        | Phage M13                                                                                       | Dr. Kenneth Sanderson, University of                        | Host: <i>Escherichia coli</i> K12 with Flac+            |



| <b>Label</b> | <b>Name and strain</b>                  | <b>Source</b>                                                  | <b>Cultivation condition</b>                                         |
|--------------|-----------------------------------------|----------------------------------------------------------------|----------------------------------------------------------------------|
|              |                                         | Calgary                                                        | plasmid                                                              |
| F2           | Phage F2                                | Dr. Kenneth Sanderson, University of Calgary                   | Host: Escherichia coli K12 with Flac+ plasmid                        |
| P22          | Phage P22 (HT105)                       | Dr. Kenneth Sanderson, University of Calgary                   | Host: Salmonella enterica typhimurium LT2                            |
| F0           | Phage F0                                | Dr. Kenneth Sanderson, University of Calgary                   | Host: Salmonella enterica typhimurium LT3                            |
| ES18         | Phage ES18 (H1)                         | Dr. Kenneth Sanderson, University of Calgary                   | Host: Salmonella enterica typhimurium LT4                            |
| 841          | Rhizobium leguminosarum bv. viciae 3841 | Dr. Anupama P. Halmillawewa (Hynes Lab), University of Calgary | TY Medium, 30°C, shaking, aerobic                                    |
| VF           | Rhizobium leguminosarum bv. viciae VF39 | Dr. Anupama P. Halmillawewa (Hynes Lab), University of Calgary | TY Medium, 30°C, shaking, aerobic                                    |
| Ne2          | Nitrosomonas europaeae ATCC 19718       | Dr. Jessica Kozlowski (Stein Lab), University of Alberta       | HEPES buffered HK medium, 22°C, in the dark, gentle shaking, aerobic |
| Nu2          | Nitrosomonas ureae Nm10                 | Dr. Jessica Kozlowski (Stein Lab), University of Alberta       | HEPES buffered HK medium, 22°C, in the dark, gentle shaking, aerobic |
| Nm2          | Nitrospira multiformis ATCC 25196       | Dr. Jessica Kozlowski (Stein Lab), University of Alberta       | HEPES buffered HK medium, 22°C, in the dark, gentle shaking, aerobic |
| Nv           | Nitrososphaera viennensis               | Dr. Jessica Kozlowski (Stein Lab), University of Alberta       | Freshwater medium, 37°C, in the dark, not shaking, aerobic           |

**Supplementary Table 8: Details on the mock community reference genome and protein sequences used in this study**

| Species and strain                                                                              | Genome Accession Number(s)                                  | Genome size (Mbp)                                            | Protein Sequences Accession Number(s)                                                         |
|-------------------------------------------------------------------------------------------------|-------------------------------------------------------------|--------------------------------------------------------------|-----------------------------------------------------------------------------------------------|
| <i>Pseudomonas denitrificans</i> ATCC 13867                                                     | NC_020829.1                                                 | 5.7                                                          | UP000012082                                                                                   |
| <i>Bacillus subtilis</i> 168                                                                    | NC_000964.3                                                 | 4.22                                                         | UP000001570                                                                                   |
| <i>Paracoccus denitrificans</i> ATCC 17741, (Beijerinck and Minkman) Davis emend. Rainey et al. | GCA_001313145.1                                             | 4.08                                                         | Used RAST to generate protein sequences. Available in the protein sequence database on PRIDE. |
| <i>Roseobacter</i> sp. AK199                                                                    | Assembled from our metagenomes                              |                                                              | Used RAST to generate protein sequences. Available in the protein sequence database on PRIDE. |
| <i>Pseudomonas pseudoalcaligenes</i> KF707                                                      | GCA_000262065.3                                             | 6.67                                                         | GCA_000262065.3                                                                               |
| <i>Chromobacterium violaceum</i> CV026                                                          | Assembled from our metagenomes                              |                                                              | Used RAST to generate protein sequences. Available in the protein sequence database on PRIDE. |
| <i>Agrobacterium tumefaciens</i> NTL4                                                           | NC_003062.2,<br>NC_003063.2,NC_003064.2, NC_003065.3        | Chr: 2.84<br>Chr: 2.08<br>Plasmid: 0.214<br>Plasmid: 0.543   | UP00000813                                                                                    |
| <i>Stenotrophomonas maltophilia</i> SeITE02                                                     | GCF_000613205.1                                             | 4.56                                                         | GCF_000613205.1                                                                               |
| <i>Cupriavidus metallidurans</i> CH34; (DSM 2839; LMG 1195; CIP 107179)                         | NC_007973.1,<br>NC_007974.2,<br>NC_007971.2,<br>NC_007972.2 | Chr: 3.93<br>Plasmid: 2.58<br>Plasmid: 0.23<br>Plasmid: 0.17 | UP000002429                                                                                   |
| <i>Pseudomonas fluorescens</i> ATCC 13525, Type strain                                          | IMG 2617270901                                              | 6.51                                                         | 2617270901 (IMG)                                                                              |
| <i>Burkholderia xenovorans</i> LB400                                                            | NC_007951.1,<br>NC_007952.1,<br>NC_007953.1                 | Chr: 4.9<br>Chr: 3.36<br>Chr: 1.47                           | UP000001817                                                                                   |
| <i>Desulfovibrio vulgaris</i> Hildenborough                                                     | NC_002937.3,NC_005863.1                                     | Chre: 3.57<br>Plasmid: 0.202                                 | UP000002194                                                                                   |
| <i>Staphylococcus aureus</i> subsp. <i>aureus</i> Rosenbach, Smith [NCTC 10399], ATCC 13709     | ENA: SAMEA3643312                                           | 2.92                                                         | Used RAST to generate protein sequences. Available in the protein sequence database on PRIDE. |
| <i>Staphylococcus aureus</i> subsp. <i>aureus</i> Rosenbach, Seattle 1945, ATCC 25923           | NZ_CP009361.1,<br>NZ_CP009362.1                             | Chr: 2.78<br>Plasmid: 0.027                                  | GCA_000756205.1                                                                               |
| <i>Alteromonas macleodii</i> ATCC 27126                                                         | NC_018632.1                                                 | 4.65                                                         | UP000006296                                                                                   |
| <i>Salmonella enterica</i> typhimurium LT2 with Flac+ Plasmid, SA2197                           | NC_003197.1,<br>NC_003277.1, F Plasmid:<br>AP001918.1       | Chr: 4.86 Plasmid:<br>0.094                                  | UP000001014                                                                                   |
| <i>Escherichia coli</i> K12 with Flac+ Plasmid                                                  | NC_000913.3, AP001918.1                                     | Chr: 4.64                                                    | UP000000625                                                                                   |
| <i>Salmonella enterica</i>                                                                      | NC_003197.1,                                                | Chr: 4.86                                                    | UP000001014                                                                                   |

| Species and strain                                           | Genome Accession Number(s)                                                                              | Genome size (Mbp)                                                                                              | Protein Sequences Accession Number(s) |
|--------------------------------------------------------------|---------------------------------------------------------------------------------------------------------|----------------------------------------------------------------------------------------------------------------|---------------------------------------|
| typhimurium LT2                                              | NC_003277.1                                                                                             | Plasmid: 0.094                                                                                                 |                                       |
| Salmonella enterica typhimurium LT2-H88, Rough mutant of LT2 | NC_003197.1,<br>NC_003277.1                                                                             | Same as LT2                                                                                                    | Same as LT2                           |
| Thermus Thermophilus HB27                                    | NC_005835.1,<br>NC_005838.1                                                                             | Chr: 1.89<br>Plasmid: 0.23                                                                                     | UP000000592                           |
| Chlamydomonas reinhardtii                                    | GCF_000002595.1                                                                                         | Mito: 0.016<br>Chloropl: 0.2<br>Nucl: 120.19                                                                   | GCF_000002595.1                       |
| Phage M13                                                    | NC_003287.2                                                                                             | 0.00641                                                                                                        | UP000002111                           |
| Phage F2                                                     | NC_001417.2, F2 Protein Coat: M24832.1                                                                  | 0.00357                                                                                                        | UP000002127                           |
| Phage P22 (HT105)                                            | NC_002371.2                                                                                             | 0.04172                                                                                                        | UP000007960                           |
| Phage F0                                                     | NC_005282.1                                                                                             | 0.08616                                                                                                        | UP000009070                           |
| Phage ES18 (H1)                                              | NC_006949.1                                                                                             | 0.0469                                                                                                         | UP000000970                           |
| Rhizobium leguminosarum bv. viciae 3841                      | NC_008380.1,<br>NC_008382.1,<br>NC_008383.1,<br>NC_008379.1,<br>NC_008381.1,<br>NC_008384.1,NC_008378.1 | Chr: 5.06<br>Plasmid: 0.15<br>Plasmid: 0.15<br>Plasmid: 0.35<br>Plasmid: 0.49<br>Plasmid: 0.68<br>Plasmid 0.87 | UP000006575                           |
| Rhizobium leguminosarum bv. viciae VF39                      | NZ_ATYQ00000000.1                                                                                       | 7.58                                                                                                           | GCA_000427765.1                       |
| Nitrosomonas europaeae ATCC 19718                            | NC_004757.1                                                                                             | 2.81                                                                                                           | UP000001416                           |
| Nitrosomonas ureae Nm10                                      | NZ_CP013341.1                                                                                           | 3.31                                                                                                           | UP000056699                           |
| Nitrospira multififormis ATCC 25196                          | NC_007614.1,<br>NC_007615.1,<br>NC_007616.1,<br>NC_007617.1                                             | Chr: 3.18<br>Plasmid: 0.02<br>Plasmid: 0.02<br>Plasmid: 0.01                                                   | UP000002718                           |
| Nitrososphaera viennensis                                    | CP007536.1                                                                                              | 2.53                                                                                                           | GCA_000698785.1                       |
