# Supplementary material for: Assessing species biomass contributions in microbial communities via metaproteomics
Source: PubMed Central journal article supplement (PMC5691128; doi:10.1038/s41467-017-01544-x), 2017-11-16
Supplement: 41467_2017_1544_MOESM4_ESM.pdf [file 41467_2017_1544_MOESM4_ESM.pdf]

**File Name:** Supplementary Data 1

**Description:** Comparison of different proteomic quantification methods using mock community samples
